# Supplementary material
Source: ML conference proceedings conference paper supplement (https://proceedings.neurips.cc/paper_files/paper/2013/hash/456ac9b0d15a8b7f1e71073221059886-Abstract.html)
Supplement: Supplementary file [file 456ac9b0d15a8b7f1e71073221059886-Supplemental.zip]

---

# Supplementary file for NIPS submission: Minimax Theory for High-dimensional Gaussian Mixtures with Sparse Mean Separation

---

**Martin Azizyan**  
Machine Learning Department  
Carnegie Mellon University  
Pittsburgh, PA 15213  
mazizyan@cs.cmu.edu

**Aarti Singh**  
Machine Learning Department  
Carnegie Mellon University  
Pittsburgh, PA 15213  
aarti@cs.cmu.edu

**Larry Wasserman**  
Department of Statistics  
Carnegie Mellon University  
Pittsburgh, PA 15213  
larry@stat.cmu.edu

## 1 Notation

For  $\theta = (\mu_1, \mu_2) \in \mathbb{R}^{2 \times d}$ , define

$$p_\theta(x) = \frac{1}{2}f(x; \mu_1, \sigma^2 I) + \frac{1}{2}f(x; \mu_2, \sigma^2 I),$$

where  $f(\cdot; \mu, \Sigma)$  is the density of  $\mathcal{N}(\mu, \Sigma)$ ,  $\sigma > 0$  is a fixed constant. Let  $P_\theta$  denote the probability measure corresponding to  $p_\theta$ . We consider two classes  $\Theta$  of parameters:

$$\begin{aligned}\Theta_\lambda &= \{(\mu_1, \mu_2) : \|\mu_1 - \mu_2\| \geq \lambda\} \\ \Theta_{\lambda,s} &= \{(\mu_1, \mu_2) : \|\mu_1 - \mu_2\| \geq \lambda, \|\mu_1 - \mu_2\|_0 \leq s\} \subseteq \Theta_\lambda.\end{aligned}$$

Throughout this document,  $\phi$  and  $\Phi$  denote the standard normal density and distribution functions.

For a mixture with parameter  $\theta$ , the Bayes optimal classification, that is, assignment of a point  $x \in \mathbb{R}^d$  to the correct mixture component, is given by the function

$$F_\theta(x) = \operatorname{argmax}_{i \in \{1,2\}} f(x; \mu_i, \sigma^2 I).$$

Given any other candidate assignment function  $F : \mathbb{R}^d \rightarrow \{1, 2\}$ , we define the loss incurred by  $F$  as

$$L_\theta(F) = \min_{\pi} P_\theta(\{x : F_\theta(x) \neq \pi(F(x))\})$$

where the minimum is over all permutations  $\pi : \{1, 2\} \rightarrow \{1, 2\}$ .

For  $X_1, \dots, X_n \stackrel{\text{i.i.d.}}{\sim} P_\theta$ , let  $\hat{\mu}_n$  and  $\hat{\Sigma}_n$  be the mean and covariance of the corresponding empirical distribution.

Also, for a matrix  $B$ ,  $v_i(B)$  and  $\lambda_i(B)$  are the  $i$ 'th eigenvector and eigenvalue of  $B$  (assuming  $B$  is symmetric), arranged so that  $\lambda_i(B) \geq \lambda_{i+1}(B)$ , and  $\|B\|_2$  is the spectral norm.

## 2 Upper bounds

### 2.1 Standard concentration bounds

#### 2.1.1 Concentration bounds for estimating the mean

**Proposition 1.** *Let  $X \sim \chi_d^2$ . Then for any  $\epsilon > 0$ ,*

$$\mathbb{P}(X > (1 + \epsilon)d) \leq \exp \left\{ -\frac{d}{2} (\epsilon - \log(1 + \epsilon)) \right\}.$$

If  $\epsilon < 1$ , then

$$\mathbb{P}(X < (1 - \epsilon)d) \leq \exp \left\{ \frac{d}{2}(\epsilon + \log(1 - \epsilon)) \right\}.$$

*Proof.* Since  $\mathbb{E}e^{tX} = (1 - 2t)^{-\frac{d}{2}}$  for  $0 < t < \frac{1}{2}$ ,

$$\begin{aligned} \mathbb{P}(X > (1 + \epsilon)d) &= \mathbb{P}(e^{tX} > e^{t(1+\epsilon)d}) \\ &\leq e^{-t(1+\epsilon)d} (1 - 2t)^{-\frac{d}{2}} \\ &= \exp \left[ -t(1 + \epsilon)d + \frac{d}{2} \log \frac{1}{1 - 2t} \right]. \end{aligned}$$

To minimize the right hand side, we differentiate the exponent with respect to  $t$  to obtain the equation

$$-(1 + \epsilon)d + \frac{d}{1 - 2t} = 0$$

which can be satisfied by setting  $t = \frac{1}{2} \left( 1 - \frac{1}{1+\epsilon} \right) < \frac{1}{2}$  (it is easy to verify that this is a global minimum). Using this value for  $t$ , the first bound follows.

Also, for  $t > 0$  and  $\epsilon < 1$ ,

$$\begin{aligned} \mathbb{P}(X < (1 - \epsilon)d) &= \mathbb{P}(e^{-tX} > e^{-t(1-\epsilon)d}) \\ &\leq e^{t(1-\epsilon)d} (1 + 2t)^{-\frac{d}{2}} \\ &= \exp \left[ t(1 - \epsilon)d - \frac{d}{2} \log(1 + 2t) \right] \end{aligned}$$

and setting  $t = \frac{1}{2} \left( \frac{1}{1-\epsilon} - 1 \right)$ ,

$$\mathbb{P}(X < (1 - \epsilon)d) \leq \exp \left[ \frac{d}{2}(\epsilon + \log(1 - \epsilon)) \right].$$

□

**Proposition 2.** Let  $Z_1, \dots, Z_n \stackrel{i.i.d.}{\sim} \mathcal{N}(0, I_d)$ . Then for any  $\epsilon > 0$ ,

$$\mathbb{P} \left( \left\| \frac{1}{n} \sum_{i=1}^n Z_i \right\| \geq \sqrt{\frac{(1 + \epsilon)d}{n}} \right) \leq \exp \left\{ -\frac{d}{2} (\epsilon - \log(1 + \epsilon)) \right\}.$$

*Proof.* Using Proposition 1,

$$\begin{aligned} \mathbb{P} \left( \left\| \frac{1}{n} \sum_{i=1}^n Z_i \right\| \geq \sqrt{\frac{(1 + \epsilon)d}{n}} \right) &= \mathbb{P} \left( \left\| \frac{1}{\sqrt{n}} \sum_{i=1}^n Z_i \right\|^2 \geq (1 + \epsilon)d \right) \\ &= \mathbb{P}(X \geq (1 + \epsilon)d) \\ &\leq \exp \left\{ -\frac{d}{2} (\epsilon - \log(1 + \epsilon)) \right\} \end{aligned}$$

where  $X \sim \chi_d^2$ .

□

### 2.1.2 Concentration bounds for estimating principal direction

**Proposition 3.** Let  $Z_1, \dots, Z_n \stackrel{i.i.d.}{\sim} \mathcal{N}(0, I_d)$  and  $\delta > 0$ . If  $n \geq d$  then with probability at least  $1 - 3\delta$ ,

$$\begin{aligned} \|\widehat{\Sigma}_n - I_d\|_2 &\leq 3 \left( 1 + \sqrt{\frac{2 \log \frac{1}{\delta}}{d}} \right) \sqrt{\frac{d}{n}} \max \left( 1, \left( 1 + \sqrt{\frac{2 \log \frac{1}{\delta}}{d}} \right) \sqrt{\frac{d}{n}} \right) \\ &\quad + \left( 1 + \sqrt{\frac{8 \log \frac{1}{\delta}}{d}} \max \left( 1, \frac{8 \log \frac{1}{\delta}}{d} \right) \right) \frac{d}{n} \end{aligned}$$

where  $\widehat{\Sigma}_n$  is the empirical covariance of  $Z_i$ .

*Proof.* Let  $\bar{Z}_n = \frac{1}{n} \sum_{i=1}^n Z_i$ . Then

$$\begin{aligned} \|\hat{\Sigma}_n - I_d\|_2 &= \left\| \frac{1}{n} \sum_{i=1}^n Z_i Z_i^T - I_d - \bar{Z}_n \bar{Z}_n^T \right\|_2 \\ &\leq \left\| \frac{1}{n} \sum_{i=1}^n Z_i Z_i^T - I_d \right\|_2 + \|\bar{Z}_n\|^2. \end{aligned}$$

It is well known that for any  $\epsilon_1 > 0$ ,

$$\mathbb{P} \left( \left\| \frac{1}{n} \sum_{i=1}^n Z_i Z_i^T - I_d \right\|_2 \geq 3(1 + \epsilon_1) \sqrt{\frac{d}{n}} \max \left( 1, (1 + \epsilon_1) \sqrt{\frac{d}{n}} \right) \right) \leq 2 \exp \left\{ -\frac{d\epsilon_1^2}{2} \right\}.$$

Using this along with Proposition 2, we have for any  $\epsilon_2 > 0$ ,

$$\begin{aligned} \mathbb{P} \left( \|\hat{\Sigma}_n - I_d\|_2 \geq 3(1 + \epsilon_1) \sqrt{\frac{d}{n}} \max \left( 1, (1 + \epsilon_1) \sqrt{\frac{d}{n}} \right) + \frac{(1 + \epsilon_2)d}{n} \right) \\ \leq 2 \exp \left\{ -\frac{d\epsilon_1^2}{2} \right\} + \exp \left\{ -\frac{d}{2} (\epsilon_2 - \log(1 + \epsilon_2)) \right\}. \end{aligned}$$

Setting  $\epsilon_1 = \sqrt{\frac{2 \log \frac{1}{\delta}}{d}}$ ,

$$\begin{aligned} \mathbb{P} \left( \|\hat{\Sigma}_n - I_d\|_2 \geq 3 \left( 1 + \sqrt{\frac{2 \log \frac{1}{\delta}}{d}} \right) \sqrt{\frac{d}{n}} \max \left( 1, \left( 1 + \sqrt{\frac{2 \log \frac{1}{\delta}}{d}} \right) \sqrt{\frac{d}{n}} \right) + \frac{(1 + \epsilon_2)d}{n} \right) \\ \leq 2\delta + \exp \left\{ -\frac{d}{2} (\epsilon_2 - \log(1 + \epsilon_2)) \right\} \\ \leq 2\delta + \exp \left\{ -\frac{d}{8} \epsilon_2 \min(1, \epsilon_2) \right\} \end{aligned}$$

and, setting  $\epsilon_2 = \sqrt{\frac{8 \log \frac{1}{\delta}}{d} \max \left( 1, \frac{8 \log \frac{1}{\delta}}{d} \right)}$ , with probability at least  $1 - 3\delta$ ,

$$\begin{aligned} \|\hat{\Sigma}_n - I_d\|_2 &\leq 3 \left( 1 + \sqrt{\frac{2 \log \frac{1}{\delta}}{d}} \right) \sqrt{\frac{d}{n}} \max \left( 1, \left( 1 + \sqrt{\frac{2 \log \frac{1}{\delta}}{d}} \right) \sqrt{\frac{d}{n}} \right) \\ &\quad + \left( 1 + \sqrt{\frac{8 \log \frac{1}{\delta}}{d} \max \left( 1, \frac{8 \log \frac{1}{\delta}}{d} \right)} \right) \frac{d}{n}. \end{aligned}$$

□

**Proposition 4.** Let  $X_1, Y_1, \dots, X_n, Y_n \stackrel{i.i.d.}{\sim} \mathcal{N}(0, 1)$ . Then for any  $\epsilon > 0$ ,

$$\mathbb{P} \left( \left| \frac{1}{n} \sum_{i=1}^n X_i Y_i \right| > \frac{\epsilon}{2} \right) \leq 2 \exp \left\{ -\frac{n\epsilon \min(1, \epsilon)}{10} \right\}.$$

*Proof.* Let  $Z = XY$  where  $X, Y \stackrel{i.i.d.}{\sim} \mathcal{N}(0, 1)$ . Then for any  $t$  such that  $|t| < 1$ ,

$$\mathbb{E} e^{tZ} = \frac{1}{\sqrt{1 - t^2}}.$$

So for  $0 < t < 1$ ,

$$\begin{aligned}
\mathbb{P}\left(\frac{1}{n} \sum_{i=1}^n X_i Y_i > \epsilon\right) &= \mathbb{P}\left(\exp\left\{\sum_{i=1}^n t X_i Y_i\right\} > \exp(n\epsilon t)\right) \\
&\leq \mathbb{E}\left(\exp\left\{\sum_{i=1}^n t X_i Y_i\right\}\right) \exp(-n\epsilon t) \\
&= (\mathbb{E} \exp(t X_i Y_i))^n \exp(-n\epsilon t) \\
&= (1 - t^2)^{-\frac{n}{2}} \exp(-n\epsilon t) \\
&= \exp\left\{-\frac{n}{2} (2\epsilon t + \log(1 - t^2))\right\}.
\end{aligned}$$

The bound is minimized by  $t = \frac{1}{2\epsilon} (\sqrt{1 + 4\epsilon^2} - 1) < 1$ , so

$$\mathbb{P}\left(\frac{1}{n} \sum_{i=1}^n X_i Y_i > \epsilon\right) \leq \exp\left\{-\frac{n}{2} h(2\epsilon)\right\}$$

where

$$h(u) = \left(\sqrt{1 + u^2} - 1\right) + \log\left(1 - \frac{1}{u^2} \left(\sqrt{1 + u^2} - 1\right)^2\right).$$

Since  $h(u) \geq \frac{u}{5} \min(1, u)$ ,

$$\mathbb{P}\left(\frac{1}{n} \sum_{i=1}^n X_i Y_i > \epsilon\right) \leq \exp\left\{-\frac{n}{2} \frac{2\epsilon}{5} \min(1, 2\epsilon)\right\}$$

and the proof is complete by noting that the distribution of  $X_i Y_i$  is symmetric.  $\square$

## 2.2 Davis–Kahan

**Lemma 1.** Let  $A, E \in \mathbb{R}^{d \times d}$  be symmetric matrices, and  $u \in \mathbb{R}^{d-1}$  such that

$$u_i = v_{i+1}(A)^T E v_1(A).$$

If  $\lambda_1(A) - \lambda_2(A) > 0$  and

$$\|E\|_2 \leq \frac{\lambda_1(A) - \lambda_2(A)}{5}$$

then

$$\sqrt{1 - (v_1(A)^T v_1(A + E))^2} \leq \frac{4\|u\|}{\lambda_1(A) - \lambda_2(A)}$$

(Corollary 8.1.11 of Golub and Van Loan (1996)).

## 2.3 Bounding error in estimating the mean

**Proposition 5.** Let  $\theta = (\mu_0 - \mu, \mu_0 + \mu)$  for some  $\mu_0, \mu \in \mathbb{R}^d$  and  $X_1, \dots, X_n \stackrel{i.i.d.}{\sim} P_\theta$ . For any  $\delta > 0$ ,

$$\mathbb{P}\left(\|\mu_0 - \hat{\mu}_n\| \geq \sigma \sqrt{\frac{2 \max(d, 8 \log \frac{1}{\delta})}{n}} + \|\mu\| \sqrt{\frac{2 \log \frac{1}{\delta}}{n}}\right) \leq 3\delta.$$

*Proof.* Let  $Z_1, \dots, Z_n \stackrel{\text{i.i.d.}}{\sim} \mathcal{N}(0, I)$  and  $Y_1, \dots, Y_n$  i.i.d. such that  $\mathbb{P}(Y_i = -1) = \mathbb{P}(Y_i = 1) = \frac{1}{2}$ . Then for any  $\epsilon_1, \epsilon_2 > 0$ ,

$$\begin{aligned}
& \mathbb{P} \left( \|\mu_0 - \hat{\mu}_n\| \geq \sigma \sqrt{\frac{(1 + \epsilon_1)d}{n}} + \|\mu\| \epsilon_2 \right) \\
&= \mathbb{P} \left( \left\| \mu_0 - \frac{1}{n} \sum_{i=1}^d (\sigma Z_i + \mu_0 + \mu Y_i) \right\| \geq \sigma \sqrt{\frac{(1 + \epsilon_1)d}{n}} + \|\mu\| \epsilon_2 \right) \\
&= \mathbb{P} \left( \left\| \sigma \frac{1}{n} \sum_{i=1}^d Z_i + \mu \frac{1}{n} \sum_{i=1}^d Y_i \right\| \geq \sigma \sqrt{\frac{(1 + \epsilon_1)d}{n}} + \|\mu\| \epsilon_2 \right) \\
&\leq \mathbb{P} \left( \sigma \left\| \frac{1}{n} \sum_{i=1}^d Z_i \right\| + \|\mu\| \left| \frac{1}{n} \sum_{i=1}^d Y_i \right| \geq \sigma \sqrt{\frac{(1 + \epsilon_1)d}{n}} + \|\mu\| \epsilon_2 \right) \\
&\leq \mathbb{P} \left( \left\| \frac{1}{n} \sum_{i=1}^d Z_i \right\| \geq \sqrt{\frac{(1 + \epsilon_1)d}{n}} \right) + \mathbb{P} \left( \left| \frac{1}{n} \sum_{i=1}^d Y_i \right| \geq \epsilon_2 \right) \\
&\leq \exp \left\{ -\frac{d}{2} (\epsilon_1 - \log(1 + \epsilon_1)) \right\} + 2 \exp \left\{ -\frac{n\epsilon_2^2}{2} \right\}
\end{aligned}$$

where the last step is using Hoeffding's inequality and Proposition 2. Setting  $\epsilon_2 = \sqrt{\frac{2 \log \frac{1}{\delta}}{n}}$ ,

$$\begin{aligned}
& \mathbb{P} \left( \|\mu_0 - \hat{\mu}_n\| \geq \sigma \sqrt{\frac{(1 + \epsilon_1)d}{n}} + \|\mu\| \sqrt{\frac{2 \log \frac{1}{\delta}}{n}} \right) \\
&\leq \exp \left\{ -\frac{d}{2} (\epsilon_1 - \log(1 + \epsilon_1)) \right\} + 2\delta.
\end{aligned}$$

Since  $\epsilon_1 - \log(1 + \epsilon_1) \geq \frac{\epsilon_1}{4} \min(1, \epsilon_1)$ ,

$$\exp \left\{ -\frac{d}{2} (\epsilon_1 - \log(1 + \epsilon_1)) \right\} \leq \exp \left\{ -\frac{d}{8} \epsilon_1 \min(1, \epsilon_1) \right\}.$$

Setting

$$\epsilon_1 = \sqrt{\frac{8 \log \frac{1}{\delta}}{d} \max \left( 1, \frac{8 \log \frac{1}{\delta}}{d} \right)},$$

we have

$$\mathbb{P} \left( \|\mu_0 - \hat{\mu}_n\| \geq \sigma \sqrt{\frac{d}{n} \left( 1 + \sqrt{\frac{8 \log \frac{1}{\delta}}{d} \max \left( 1, \frac{8 \log \frac{1}{\delta}}{d} \right)} \right)} + \|\mu\| \sqrt{\frac{2 \log \frac{1}{\delta}}{n}} \right) \leq 3\delta$$

and the bound follows.  $\square$

## 2.4 Bounding error in estimating principal direction

**Proposition 6.** Let  $\theta = (\mu_0 - \mu, \mu_0 + \mu)$  for some  $\mu_0, \mu \in \mathbb{R}^d$  and  $X_1, \dots, X_n \stackrel{i.i.d.}{\sim} P_\theta$ . If  $n \geq d$  then for any  $\delta, \delta_1 > 0$ , with probability at least  $1 - 5\delta - 2\delta_1$ ,

$$\begin{aligned} & \|\widehat{\Sigma}_n - (\sigma^2 I_d + \mu\mu^T)\|_2 \\ & \leq 3\sigma^2 \left(1 + \sqrt{\frac{2 \log \frac{1}{\delta}}{d}}\right) \sqrt{\frac{d}{n}} \max \left(1, \left(1 + \sqrt{\frac{2 \log \frac{1}{\delta}}{d}}\right) \sqrt{\frac{d}{n}}\right) \\ & \quad + \sigma^2 \left(1 + \sqrt{\frac{8 \log \frac{1}{\delta}}{d} \max \left(1, \frac{8 \log \frac{1}{\delta}}{d}\right)}\right) \frac{d}{n} \\ & \quad + 4\sigma\|\mu\| \sqrt{\left(1 + \sqrt{\frac{8 \log \frac{1}{\delta}}{d} \max \left(1, \frac{8 \log \frac{1}{\delta}}{d}\right)}\right) \frac{d}{n} + \frac{2\|\mu\|^2 \log \frac{1}{\delta_1}}{n}} \end{aligned}$$

where  $\widehat{\Sigma}_n$  is the empirical covariance of  $X_i$ .

*Proof.* We can express  $X_i$  as  $X_i = \sigma Z_i + \mu Y_i + \mu_0$  where  $Z_1, \dots, Z_n \stackrel{i.i.d.}{\sim} \mathcal{N}(0, I_d)$  and  $Y_1, \dots, Y_n$  i.i.d. such that  $\mathbb{P}(Y_i = -1) = \mathbb{P}(Y_i = 1) = \frac{1}{2}$ . Then

$$\begin{aligned} \widehat{\Sigma}_n - (\sigma^2 I_d + \mu\mu^T) &= \sigma^2 (\widehat{\Sigma}_n^Z - I_d) - \mu\mu^T \bar{Y}^2 \\ & \quad + \sigma \left( \frac{1}{n} \sum_{i=1}^n Y_i Z_i - \bar{Y} \bar{Z} \right) \mu^T \\ & \quad + \sigma \mu \left( \frac{1}{n} \sum_{i=1}^n Y_i Z_i - \bar{Y} \bar{Z} \right)^T \end{aligned}$$

where  $\widehat{\Sigma}_n^Z$  is the empirical covariance of  $Z_i$  and  $\bar{Y}$  and  $\bar{Z}$  are the empirical means of  $Y_i$  and  $Z_i$ . So

$$\begin{aligned} \|\widehat{\Sigma}_n - (\sigma^2 I_d + \mu\mu^T)\|_2 &\leq \sigma^2 \|\widehat{\Sigma}_n^Z - I_d\|_2 + \|\mu\|^2 \bar{Y}^2 \\ & \quad + 2\sigma\|\mu\| \left( \left\| \frac{1}{n} \sum_{i=1}^n Y_i Z_i \right\| + |\bar{Y}| \|\bar{Z}\| \right). \end{aligned}$$

By Hoeffding's inequality,

$$\mathbb{P} \left( \|\mu\|^2 \bar{Y}^2 \geq \frac{2\|\mu\|^2 \log \frac{1}{\delta_1}}{n} \right) \leq 2\delta_1.$$

Since  $|\bar{Y}| \leq 1$  and since  $Y_i Z_i$  has the same distribution as  $Z_i$ , by Proposition 2, for any  $\epsilon > 0$ ,

$$\begin{aligned} & \mathbb{P} \left( 2\sigma\|\mu\| \left( \left\| \frac{1}{n} \sum_{i=1}^n Y_i Z_i \right\| + |\bar{Y}| \|\bar{Z}\| \right) \geq 4\sigma\|\mu\| \sqrt{\frac{(1+\epsilon)d}{n}} \right) \\ & \leq 2 \exp \left\{ -\frac{d}{2} (\epsilon - \log(1+\epsilon)) \right\} \leq 2 \exp \left\{ -\frac{d}{8} \epsilon \min(1, \epsilon) \right\}. \end{aligned}$$

Setting

$$\epsilon = \sqrt{\frac{8 \log \frac{1}{\delta}}{d} \max \left(1, \frac{8 \log \frac{1}{\delta}}{d}\right)}$$

we have

$$\begin{aligned} & \mathbb{P} \left( 2\sigma\|\mu\| \left( \left\| \frac{1}{n} \sum_{i=1}^n Y_i Z_i \right\| + |\bar{Y}| \|\bar{Z}\| \right) \geq 4\sigma\|\mu\| \sqrt{\left(1 + \sqrt{\frac{8 \log \frac{1}{\delta}}{d} \max \left(1, \frac{8 \log \frac{1}{\delta}}{d}\right)}\right) \frac{d}{n}} \right) \\ & \leq 2\delta. \end{aligned}$$

Finally, by Proposition 3, with probability at least  $1 - 3\delta$ ,

$$\begin{aligned} \sigma^2 \|\widehat{\Sigma}_n^Z - I_d\|_2 &\leq 3\sigma^2 \left( 1 + \sqrt{\frac{2 \log \frac{1}{\delta}}{d}} \right) \sqrt{\frac{d}{n}} \max \left( 1, \left( 1 + \sqrt{\frac{2 \log \frac{1}{\delta}}{d}} \right) \sqrt{\frac{d}{n}} \right) \\ &\quad + \sigma^2 \left( 1 + \sqrt{\frac{8 \log \frac{1}{\delta}}{d} \max \left( 1, \frac{8 \log \frac{1}{\delta}}{d} \right)} \right) \frac{d}{n} \end{aligned}$$

and we complete the proof by combining the three bounds.  $\square$

**Proposition 7.** Let  $\theta = (\mu_0 - \mu, \mu_0 + \mu)$  for some  $\mu_0, \mu \in \mathbb{R}^d$  and  $X_1, \dots, X_n \stackrel{i.i.d.}{\sim} P_\theta$ . If  $n \geq d > 1$  then for any  $0 < \delta \leq \frac{1}{\sqrt{e}}$  and  $i \in [2..d]$ , with probability at least  $1 - 7\delta$ ,

$$\begin{aligned} &\left| v_i(\sigma^2 I + \mu\mu^T)^T (\widehat{\Sigma}_n - (\sigma^2 I + \mu\mu^T)) v_i(\sigma^2 I + \mu\mu^T) \right| \\ &\leq \sigma^2 \frac{1}{2} \sqrt{\frac{10 \log \frac{1}{\delta}}{n} \max \left( 1, \frac{10 \log \frac{1}{\delta}}{n} \right)} + \sigma \|\mu\| \sqrt{\frac{2 \log \frac{1}{\delta}}{n}} + (\sigma^2 + \sigma \|\mu\|) \frac{2 \log \frac{1}{\delta}}{n}. \end{aligned}$$

*Proof.* Let  $Z_1, W_1, \dots, Z_n, W_n \stackrel{i.i.d.}{\sim} \mathcal{N}(0, 1)$  and  $Y_1, \dots, Y_n$  i.i.d. such that  $\mathbb{P}(Y_i = -1) = \mathbb{P}(Y_i = 1) = \frac{1}{2}$ . It is easy to see that the quantity of interest is equal in distribution to

$$\left| \frac{1}{n} \sum_{j=1}^n (\sigma Z_i - \sigma \bar{Z})(\sigma W_i - \sigma \bar{W} + \|\mu\| Y_i - \|\mu\| \bar{Y}) \right|$$

where  $\bar{Z}, \bar{W}, \bar{Y}$  are the respective empirical means. Moreover,

$$\begin{aligned} &\left| \frac{1}{n} \sum_{j=1}^n (\sigma Z_i - \sigma \bar{Z})(\sigma W_i - \sigma \bar{W} + \|\mu\| Y_i - \|\mu\| \bar{Y}) \right| \\ &\leq \sigma^2 \left| \frac{1}{n} \sum_{j=1}^n Z_i W_i \right| + \sigma^2 |\bar{Z}| |\bar{W}| + \sigma \|\mu\| \left| \frac{1}{n} \sum_{j=1}^n Z_i Y_i \right| + \sigma \|\mu\| |\bar{Z}| |\bar{Y}|. \end{aligned}$$

From Proposition 4, we have

$$\mathbb{P} \left( \left| \frac{1}{n} \sum_{i=1}^n Z_i W_i \right| > \frac{1}{2} \sqrt{\frac{10 \log \frac{1}{\delta}}{n} \max \left( 1, \frac{10 \log \frac{1}{\delta}}{n} \right)} \right) \leq 2\delta;$$

using Hoeffding's inequality,

$$\mathbb{P} \left( |\bar{Y}| \geq \sqrt{\frac{2 \log \frac{1}{\delta}}{n}} \right) \leq 2\delta;$$

and using the Gaussian tail bound, for  $\delta \leq \frac{1}{\sqrt{e}}$ ,

$$\mathbb{P} \left( |\bar{Z}| \geq \sqrt{\frac{2 \log \frac{1}{\delta}}{n}} \right) \leq \delta$$

and the final result follows easily.  $\square$

**Proposition 8.** Let  $\theta = (\mu_0 - \mu, \mu_0 + \mu)$  for some  $\mu_0, \mu \in \mathbb{R}^d$  and  $X_1, \dots, X_n \stackrel{i.i.d.}{\sim} P_\theta$  with  $d > 1$  and  $n \geq 4d$ . For any  $0 < \delta < \frac{d-1}{\sqrt{e}}$ , if

$$\max \left( \frac{\sigma^2}{\|\mu\|^2}, \frac{\sigma}{\|\mu\|} \right) \sqrt{\frac{\max(d, 8 \log \frac{1}{\delta})}{n}} \leq \frac{1}{160}$$

then with probability at least  $1 - 12\delta - 2 \exp(-\frac{n}{20})$ ,

$$\sqrt{1 - (v_1(\sigma^2 I + \mu\mu^T)^T v_1(\widehat{\Sigma}_n))^2} \leq 14 \max\left(\frac{\sigma^2}{\|\mu\|^2}, \frac{\sigma}{\|\mu\|}\right) \sqrt{d} \sqrt{\frac{10 \log \frac{d}{\delta}}{n} \max\left(1, \frac{10 \log \frac{d}{\delta}}{n}\right)}.$$

*Proof.* By Proposition 6 (with  $\delta_1 = \exp(-\frac{n}{20})$ ), Proposition 7 (with  $\delta_2 = \frac{\delta}{d-1}$ ), and Lemma 1, with probability at least  $1 - 12\delta - 2 \exp(-\frac{n}{20})$ ,

$$\begin{aligned} & \sqrt{1 - (v_1(\sigma^2 I + \mu\mu^T)^T v_1(\widehat{\Sigma}_n))^2} \\ & \leq \frac{4\sqrt{d-1}}{\|\mu\|^2} \left[ \sigma^2 \frac{1}{2} \sqrt{\frac{10 \log \frac{d-1}{\delta}}{n} \max\left(1, \frac{10 \log \frac{d-1}{\delta}}{n}\right)} + \sigma \|\mu\| \sqrt{\frac{2 \log \frac{d-1}{\delta}}{n}} + (\sigma^2 + \sigma \|\mu\|) \frac{2 \log \frac{d-1}{\delta}}{n} \right] \end{aligned}$$

and the result follows after some simplifications.  $\square$

## 2.5 General result relating error in estimating mean and principal direction to clustering loss

**Proposition 9.** Let  $\theta = (\mu_0 - \mu, \mu_0 + \mu)$  and let

$$\widehat{F}(x) = \begin{cases} 1 & \text{if } x^T v \geq x_0^T v \\ 2 & \text{otherwise} \end{cases}$$

for some  $x_0, v \in \mathbb{R}^d$ , with  $\|v\| = 1$ . Define  $\cos \beta = |v^T \mu| / \|\mu\|$ . If  $|(x_0 - \mu_0)^T v| \leq \sigma \epsilon_1 + \|\mu\| \epsilon_2$  for some  $\epsilon_1 \geq 0$  and  $0 \leq \epsilon_2 \leq \frac{1}{4}$ , and if  $\sin \beta \leq \frac{1}{\sqrt{5}}$ , then

$$L_\theta(\widehat{F}) \leq \exp\left\{-\frac{1}{2} \max\left(0, \frac{\|\mu\|}{2\sigma} - 2\epsilon_1\right)^2\right\} \left[2\epsilon_1 + \epsilon_2 \frac{\|\mu\|}{\sigma} + 2 \sin \beta \left(2 \sin \beta \frac{\|\mu\|}{\sigma} + 1\right)\right].$$

*Proof.*

$$\begin{aligned} L_\theta(\widehat{F}) &= \min_{\pi} P_\theta(\{x : F_\theta(x) \neq \pi(\widehat{F}(x))\}) \\ &= \min \{P_\theta[\{x : ((x - \mu_0)^T \mu)((x - x_0)^T v) \geq 0\}], \\ &\quad P_\theta[\{x : ((x - \mu_0)^T \mu)((x - x_0)^T v) \leq 0\}]\}. \end{aligned}$$

WLOG assume  $v^T \mu \geq 0$  (otherwise we can simply replace  $v$  with  $-v$ , which does not affect the bound). Then

$$\begin{aligned} L_\theta(\widehat{F}) &= P_\theta[\{x : ((x - \mu_0)^T \mu)((x - x_0)^T v) \leq 0\}] \\ &= P_\theta[\{x : ((x - \mu_0)^T \mu)((x - \mu_0)^T v - (x_0 - \mu_0)^T v) \leq 0\}] \\ &= P_\theta\left[\left\{x : \left((x - \mu_0)^T \frac{\mu}{\|\mu\|}\right)((x - \mu_0)^T v - (x_0 - \mu_0)^T v) \leq 0\right\}\right]. \end{aligned}$$

Define

$$\begin{aligned} \check{\mu} &= \frac{\mu}{\|\mu\|}, \\ \check{x} &= (x - \mu_0)^T \check{\mu}, \end{aligned}$$

and

$$\check{y} = (x - \mu_0)^T \frac{v - \check{\mu}\check{\mu}^T v}{\|v - \check{\mu}\check{\mu}^T v\|} \equiv (x - \mu_0)^T \frac{v - \check{\mu}\check{\mu}^T v}{\sin \beta}$$

so that

$$\begin{aligned} L_\theta(\widehat{F}) &= P_\theta[\{x : \check{x}(\check{y} \sin \beta + \check{x} \cos \beta - (x_0 - \mu_0)^T v) \leq 0\}] \\ &= P_\theta[\{x : \min(0, B(\check{y})) \leq \check{x} \leq \max(0, B(\check{y}))\}] \end{aligned}$$



where

$$B(\check{y}) = \frac{(x_0 - \mu_0)^T v}{\cos \beta} - \check{y} \tan \beta.$$

Since  $\check{x}$  and  $\check{y}$  are projections of  $x - \mu_0$  onto orthogonal unit vectors, and since  $\check{x}$  is exactly the component of  $x - \mu_0$  that lies in the direction of  $\mu$ , we can integrate out all other directions and obtain

$$L_\theta(\widehat{F}) = \int_{-\infty}^{\infty} \phi_\sigma(\check{y}) \int_{\min(0, B(\check{y}))}^{\max(0, B(\check{y}))} \left( \frac{1}{2} \phi_\sigma(\check{x} + \|\mu\|) + \frac{1}{2} \phi_\sigma(\check{x} - \|\mu\|) \right) d\check{x} d\check{y}$$

where  $\phi_\sigma$  is the density of  $\mathcal{N}(0, \sigma^2)$ . But,

$$\begin{aligned} & \int_{\min(0, B(\check{y}))}^{\max(0, B(\check{y}))} \left( \frac{1}{2} \phi_\sigma(\check{x} + \|\mu\|) + \frac{1}{2} \phi_\sigma(\check{x} - \|\mu\|) \right) d\check{x} \\ &= \frac{1}{2} \int_{\min(0, B(\check{y}))}^{\max(0, B(\check{y}))} \phi_\sigma(\check{x} + \|\mu\|) d\check{x} + \frac{1}{2} \int_{\min(0, B(\check{y}))}^{\max(0, B(\check{y}))} \phi_\sigma(\check{x} - \|\mu\|) d\check{x} \\ &= \frac{1}{2} \left( \Phi \left( \frac{\max(0, B(\check{y})) + \|\mu\|}{\sigma} \right) - \Phi \left( \frac{\min(0, B(\check{y})) + \|\mu\|}{\sigma} \right) \right) \\ &+ \frac{1}{2} \left( -\Phi \left( \frac{-\max(0, B(\check{y})) + \|\mu\|}{\sigma} \right) + \Phi \left( \frac{-\min(0, B(\check{y})) + \|\mu\|}{\sigma} \right) \right) \\ &= \frac{1}{2} \left( \Phi \left( \frac{\|\mu\| + |B(\check{y})|}{\sigma} \right) - \Phi \left( \frac{\|\mu\| - |B(\check{y})|}{\sigma} \right) \right). \end{aligned}$$

Since the above quantity is increasing in  $|B(\check{y})|$ , and since  $|B(\check{y})| \leq |\check{y}| \tan \beta + r$  where

$$r = \left| \frac{(x_0 - \mu_0)^T v}{\cos \beta} \right|,$$

we have that, replacing  $\check{y}$  by  $x$ ,

$$\begin{aligned} L_\theta(\widehat{F}) &\leq \frac{1}{2} \int_{-\infty}^{\infty} \frac{1}{\sigma} \phi \left( \frac{x}{\sigma} \right) \left[ \Phi \left( \frac{\|\mu\| + |x| \tan \beta + r}{\sigma} \right) - \Phi \left( \frac{\|\mu\| - |x| \tan \beta - r}{\sigma} \right) \right] dx \\ &\leq \int_{-\infty}^{\infty} \frac{1}{\sigma} \phi \left( \frac{x}{\sigma} \right) \left[ \Phi \left( \frac{\|\mu\|}{\sigma} \right) - \Phi \left( \frac{\|\mu\| - |x| \tan \beta - r}{\sigma} \right) \right] dx \\ &= \int_{-\infty}^{\infty} \phi(x) \left[ \Phi \left( \frac{\|\mu\|}{\sigma} \right) - \Phi \left( \frac{\|\mu\| - r}{\sigma} - |x| \tan \beta \right) \right] dx \\ &+ \left[ \Phi \left( \frac{\|\mu\|}{\sigma} \right) - \Phi \left( \frac{\|\mu\| - r}{\sigma} \right) \right]. \end{aligned}$$

Since  $\tan \beta \leq \frac{1}{2}$ , we have that  $r \leq 2|(x_0 - \mu_0)^T v| \leq 2\sigma\epsilon_1 + 2\|\mu\|\epsilon_2$  and

$$\begin{aligned} \Phi \left( \frac{\|\mu\|}{\sigma} \right) - \Phi \left( \frac{\|\mu\| - r}{\sigma} \right) &\leq \frac{r}{\sigma} \phi \left( \max \left( 0, \frac{\|\mu\| - r}{\sigma} \right) \right) \\ &\leq \left( 2\epsilon_1 + 2\epsilon_2 \frac{\|\mu\|}{\sigma} \right) \phi \left( \max \left( 0, (1 - 2\epsilon_2) \frac{\|\mu\|}{\sigma} - 2\epsilon_1 \right) \right), \end{aligned}$$

and since  $\epsilon_2 \leq \frac{1}{4}$ ,

$$\Phi \left( \frac{\|\mu\|}{\sigma} \right) - \Phi \left( \frac{\|\mu\| - r}{\sigma} \right) \leq 2 \left( \epsilon_1 + \epsilon_2 \frac{\|\mu\|}{\sigma} \right) \phi \left( \max \left( 0, \frac{\|\mu\|}{2\sigma} - 2\epsilon_1 \right) \right).$$

Defining  $A = \left\lfloor \frac{\|\mu\| - r}{\sigma} \right\rfloor$ ,

$$\begin{aligned}
& \int_{-\infty}^{\infty} \phi(x) \left[ \Phi\left(\frac{\|\mu\| - r}{\sigma}\right) - \Phi\left(\frac{\|\mu\| - r}{\sigma} - |x| \tan \beta\right) \right] dx \\
& \leq 2 \int_0^{\infty} \int_{A - x \tan \beta}^A \phi(x) \phi(y) dy dx = 2 \int_{-A \sin \beta}^{\infty} \int_{A \cos \beta}^{A \cos \beta + (x + A \sin \beta) \tan \beta} \phi(x) \phi(y) dy dx \\
& \leq 2\phi(A \cos \beta) \tan \beta \int_{-A \sin \beta}^{\infty} (x + A \sin \beta) \phi(x) dx \\
& = 2\phi(A \cos \beta) \tan \beta (A \sin \beta \Phi(A \sin \beta) + \phi(A \sin \beta)) \\
& \leq 2\phi(A) \tan \beta (A \sin \beta + 1) \\
& \leq 2\phi\left(\max\left(0, \frac{\|\mu\| - r}{\sigma}\right)\right) \tan \beta \left(\left(\frac{\|\mu\| + r}{\sigma}\right) \sin \beta + 1\right)
\end{aligned}$$

and

$$\begin{aligned}
& \int_{-\infty}^{\infty} \phi(x) \left[ \Phi\left(\frac{\|\mu\| - r}{\sigma}\right) - \Phi\left(\frac{\|\mu\| - r}{\sigma} - |x| \tan \beta\right) \right] dx \\
& \leq 2\phi\left(\max\left(0, \frac{\|\mu\|}{2\sigma} - 2\epsilon_1\right)\right) \tan \beta \left(\left(2\frac{\|\mu\|}{\sigma} + 2\epsilon_1\right) \sin \beta + 1\right).
\end{aligned}$$

So we have that

$$\begin{aligned}
L_{\theta}(\widehat{F}) & \leq 2\left(\epsilon_1 + \epsilon_2 \frac{\|\mu\|}{\sigma}\right) \phi\left(\max\left(0, \frac{\|\mu\|}{2\sigma} - 2\epsilon_1\right)\right) \\
& + 2\phi\left(\max\left(0, \frac{\|\mu\|}{2\sigma} - 2\epsilon_1\right)\right) \tan \beta \left(\left(2\frac{\|\mu\|}{\sigma} + 2\epsilon_1\right) \sin \beta + 1\right) \\
& \leq \phi\left(\max\left(0, \frac{\|\mu\|}{2\sigma} - 2\epsilon_1\right)\right) \times \\
& \times \left[2\epsilon_1 + 2\epsilon_2 \frac{\|\mu\|}{\sigma} + 4 \sin \beta \tan \beta \frac{\|\mu\|}{\sigma} + 4\epsilon_1 \sin \beta \tan \beta + 2 \tan \beta\right] \\
& \leq \exp\left\{-\frac{1}{2} \max\left(0, \frac{\|\mu\|}{2\sigma} - 2\epsilon_1\right)^2\right\} \left[2\epsilon_1 + \epsilon_2 \frac{\|\mu\|}{\sigma} + \tan \beta \left(2 \sin \beta \frac{\|\mu\|}{\sigma} + 1\right)\right].
\end{aligned}$$

□

## 2.6 Non-sparse upper bound

**Theorem 1.** For any  $\theta \in \Theta_{\lambda}$  and  $X_1, \dots, X_n \stackrel{i.i.d.}{\sim} P_{\theta}$ , let

$$\widehat{F}(x) = \begin{cases} 1 & \text{if } x^T v_1(\widehat{\Sigma}_n) \geq \widehat{\mu}_n^T v_1(\widehat{\Sigma}_n) \\ 2 & \text{otherwise,} \end{cases}$$

and let  $n \geq \max(68, 4d)$ ,  $d \geq 1$ .

Then

$$\sup_{\theta \in \Theta_{\lambda}} \mathbb{E} L_{\theta}(\widehat{F}) \leq 600 \max\left(\frac{4\sigma^2}{\lambda^2}, 1\right) \sqrt{\frac{d \log(nd)}{n}}.$$

Furthermore, if  $\frac{\lambda}{\sigma} \geq 2 \max(80, 14\sqrt{5d})$ , then

$$\sup_{\theta \in \Theta_{\lambda}} \mathbb{E} L_{\theta}(\widehat{F}) \leq 17 \exp\left(-\frac{n}{32}\right) + 9 \exp\left(-\frac{\lambda^2}{80\sigma^2}\right).$$

*Proof.* Using Propositions 5 and 8 with  $\delta = \frac{1}{\sqrt{n}}$ , Proposition 9, and the fact that  $(C + x) \exp(-\max(0, x - 4)^2/8) \leq (C + 6) \exp(-\max(0, x - 4)^2/10)$  for all  $C, x > 0$ ,

$$\mathbb{E}L_\theta(\hat{F}) \leq 600 \max\left(\frac{4\sigma^2}{\lambda^2}, 1\right) \sqrt{\frac{d \log(nd)}{n}}$$

(it is easy to verify that the bounds are decreasing with  $\|\mu\|$ , so we use  $\|\mu\| = \frac{\lambda}{2}$  to bound the supremum). Note that the  $d = 1$  case must be handled separately, but results in a bound that agrees with the above.

Also, when  $\frac{\lambda}{\sigma} \geq 2 \max(80, 14\sqrt{5d})$ , using  $\delta = \exp(-\frac{n}{32})$ ,

$$\mathbb{E}L_\theta(\hat{F}) \leq 17 \exp\left(-\frac{n}{32}\right) + 9 \exp\left(-\frac{\lambda^2}{80\sigma^2}\right).$$

□

## 2.7 Estimating the support in the sparse case

**Proposition 10.** Let  $\theta = (\mu_0 - \mu, \mu_0 + \mu)$  for some  $\mu_0, \mu \in \mathbb{R}^d$  and  $X_1, \dots, X_n \stackrel{i.i.d.}{\sim} P_\theta$ . For any  $0 < \delta < \frac{1}{\sqrt{e}}$  such that  $\sqrt{\frac{6 \log \frac{1}{\delta}}{n}} \leq \frac{1}{2}$ , with probability at least  $1 - 6d\delta$ ,

$$|\hat{\Sigma}_n(i, i) - (\sigma^2 + \mu(i)^2)| \leq \sigma^2 \sqrt{\frac{6 \log \frac{1}{\delta}}{n}} + 2\sigma|\mu(i)| \sqrt{\frac{2 \log \frac{1}{\delta}}{n}} + (\sigma + |\mu(i)|)^2 \frac{2 \log \frac{1}{\delta}}{n}$$

for all  $i \in [d]$ .

*Proof.* Consider any  $i \in [d]$ . Let  $Z_1, \dots, Z_n \stackrel{i.i.d.}{\sim} \mathcal{N}(0, 1)$  and  $Y_1, \dots, Y_n$  i.i.d. such that  $\mathbb{P}(Y_j = -1) = \mathbb{P}(Y_j = 1) = \frac{1}{2}$ . Then  $\hat{\Sigma}_n(i, i)$  is equal in distribution to

$$\frac{1}{n} \sum_{j=1}^n (\sigma Z_j + \mu(i) Y_j - \sigma \bar{Z} - \mu(i) \bar{Y})^2$$

where  $\bar{Z}$  and  $\bar{Y}$  are the respective empirical means, and

$$\begin{aligned} \frac{1}{n} \sum_{j=1}^n (\sigma Z_j + \mu(i) Y_j - \sigma \bar{Z} - \mu(i) \bar{Y})^2 &= \frac{1}{n} \sum_{j=1}^n (\sigma Z_j + \mu(i) Y_j)^2 - (\sigma \bar{Z} + \mu(i) \bar{Y})^2 \\ &= \sigma^2 \frac{1}{n} \sum_{j=1}^n Z_j^2 + \mu(i)^2 + 2\sigma\mu(i) \frac{1}{n} \sum_{j=1}^n Z_j Y_j \\ &\quad - \sigma^2 \bar{Z}^2 - \mu(i)^2 \bar{Y}^2 - 2\sigma\mu(i) \bar{Z} \bar{Y} \end{aligned}$$

So, by Hoeffding's inequality, a Gaussian tail bound, and Proposition 1, we have that for any  $0 < \delta < \frac{1}{\sqrt{e}}$ , with probability at least  $1 - 6\delta$ ,

$$|\hat{\Sigma}_n(i, i) - (\sigma^2 + \mu(i)^2)| \leq \sigma^2 \sqrt{\frac{6 \log \frac{1}{\delta}}{n}} + 2\sigma|\mu(i)| \sqrt{\frac{2 \log \frac{1}{\delta}}{n}} + (\sigma + |\mu(i)|)^2 \frac{2 \log \frac{1}{\delta}}{n}$$

where we have used the fact that for  $\epsilon \in (0, 0.5]$ ,

$$\max\{-\epsilon + \log(1 + \epsilon), \epsilon + \log(1 - \epsilon)\} \leq -\frac{\epsilon^2}{3}$$

and the result follows easily. □

**Proposition 11.** Let  $\theta = (\mu_0 - \mu, \mu_0 + \mu)$  for some  $\mu_0, \mu \in \mathbb{R}^d$  and  $X_1, \dots, X_n \stackrel{i.i.d.}{\sim} P_\theta$ . Define

$$\begin{aligned} S(\theta) &= \{i \in [d] : \mu(i) \neq 0\}, \\ \alpha &= \sqrt{\frac{6 \log(nd)}{n}} + \frac{2 \log(nd)}{n}, \\ \tilde{S}(\theta) &= \{i \in [d] : |\mu(i)| \geq 4\sigma\sqrt{\alpha}\}, \\ \hat{\tau}_n &= \frac{1+\alpha}{1-\alpha} \min_{i \in [d]} \hat{\Sigma}_n(i, i), \end{aligned}$$

and

$$\hat{S}_n = \{i \in [d] : \hat{\Sigma}_n(i, i) > \hat{\tau}_n\}.$$

Assume that  $n \geq 1$ ,  $d \geq 2$ , and  $\alpha \leq \frac{1}{4}$ . Then  $\tilde{S}(\theta) \subseteq \hat{S}_n \subseteq S(\theta)$  with probability at least  $1 - \frac{6}{n}$ .

*Proof.* By Proposition 10, with probability at least  $1 - \frac{6}{n}$ ,

$$|\hat{\Sigma}_n(i, i) - (\sigma^2 + \mu(i)^2)| \leq \sigma^2 \sqrt{\frac{6 \log(nd)}{n}} + 2\sigma|\mu(i)| \sqrt{\frac{2 \log(nd)}{n}} + (\sigma + |\mu(i)|)^2 \frac{2 \log(nd)}{n}$$

for all  $i \in [d]$ . Assume the above event holds. If  $S(\theta) = [d]$ , then of course  $\hat{S}_n \subseteq S(\theta)$ . Otherwise, for  $i \notin S(\theta)$ ,

$$(1 - \alpha)\sigma^2 \leq \hat{\Sigma}_n(i, i) \leq (1 + \alpha)\sigma^2$$

so it is clear that  $\hat{S}_n \subseteq S(\theta)$ .

The remainder of the proof is trivial if  $\tilde{S}(\theta) = \emptyset$  or  $S(\theta) = \emptyset$ . Assume otherwise. For any  $i \in S(\theta)$ ,

$$\begin{aligned} \hat{\Sigma}_n(i, i) &\geq (1 - \alpha)\sigma^2 + \mu(i)^2 - 2\sigma|\mu(i)| \sqrt{\frac{2 \log(nd)}{n}} - 2\sigma|\mu(i)| \frac{2 \log(nd)}{n} - \mu(i)^2 \frac{2 \log(nd)}{n} \\ &\geq (1 - \alpha)\sigma^2 + \left(1 - \frac{2 \log(nd)}{n}\right) \mu(i)^2 - 2\alpha\sigma|\mu(i)|. \end{aligned}$$

By definition,  $|\mu(i)| \geq 4\sigma\sqrt{\alpha}$  for all  $i \in \tilde{S}(\theta)$ , so

$$\frac{(1 + \alpha)^2}{1 - \alpha} \sigma^2 \leq (1 - \alpha)\sigma^2 + \left(1 - \frac{2 \log(nd)}{n}\right) \mu(i)^2 - 2\alpha\sigma|\mu(i)| \leq \hat{\Sigma}_n(i, i)$$

and  $i \in \hat{S}_n$  (we ignore strict equality above as a measure 0 event), i.e.  $\tilde{S}(\theta) \subseteq \hat{S}_n$ , which concludes the proof.  $\square$

## 2.8 Sparse upper bound

**Theorem 2.** For any  $\theta = (\mu_0 - \mu, \mu_0 + \mu) \in \Theta_{\lambda, s}$  and  $X_1, \dots, X_n \stackrel{i.i.d.}{\sim} P_\theta$  with  $n \geq \max(68, 4s)$  and  $s \geq 1$ , define

$$\begin{aligned} \alpha &= \sqrt{\frac{6 \log(nd)}{n}} + \frac{2 \log(nd)}{n}, \\ \hat{\tau}_n &= \frac{1+\alpha}{1-\alpha} \min_{i \in [d]} \hat{\Sigma}_n(i, i), \end{aligned}$$

and

$$\hat{S}_n = \{i \in [d] : \hat{\Sigma}_n(i, i) > \hat{\tau}_n\}.$$

Assume that  $d \geq 2$ , and  $\alpha \leq \frac{1}{4}$ . Let

$$\hat{F}_n(x) = \begin{cases} 1 & \text{if } x_{\hat{S}_n}^T v_1(\hat{\Sigma}_{\hat{S}_n}) \geq \hat{\mu}_{\hat{S}_n}^T v_1(\hat{\Sigma}_{\hat{S}_n}) \\ 2 & \text{otherwise} \end{cases}$$

where  $\hat{\mu}_{\hat{S}_n}$  and  $\hat{\Sigma}_{\hat{S}_n}$  are the empirical mean and covariance of  $X_i$  for the dimensions in  $\hat{S}_n$ , and 0 elsewhere. Then

$$\sup_{\theta \in \Theta_{\lambda, s}} \mathbb{E} L_\theta(\hat{F}) \leq 603 \max\left(\frac{16\sigma^2}{\lambda^2}, 1\right) \sqrt{\frac{s \log(ns)}{n}} + 220 \frac{\sigma\sqrt{s}}{\lambda} \left(\frac{\log(nd)}{n}\right)^{\frac{1}{4}}.$$

*Proof.* Define

$$S(\theta) = \{i \in [d] : \mu(i) \neq 0\}$$

and

$$\tilde{S}(\theta) = \{i \in [d] : |\mu(i)| \geq 4\sigma\sqrt{\alpha}\},$$

Assume  $\tilde{S}(\theta) \subseteq \hat{S}_n \subseteq S(\theta)$  (by Proposition 11, this holds with probability at least  $1 - \frac{6}{n}$ ). If  $\tilde{S}(\theta) = \emptyset$ , then we simply have  $\mathbb{E}L_\theta(\hat{F}_n) \leq \frac{1}{2}$ .

Assume  $\tilde{S}(\theta) \neq \emptyset$ . Let

$$\cos \hat{\beta} = |v_1(\hat{\Sigma}_{\hat{S}_n})^T v_1(\Sigma)|,$$

$$\cos \tilde{\beta} = |v_1(\Sigma_{\tilde{S}_n})^T v_1(\Sigma)|,$$

and

$$\cos \beta = |v_1(\hat{\Sigma}_{\hat{S}_n})^T v_1(\Sigma_{\hat{S}_n})|$$

where  $\Sigma = \sigma^2 I + \mu\mu^T$ , and  $\Sigma_{\hat{S}_n}$  is the same as  $\Sigma$  in  $\hat{S}_n$ , and 0 elsewhere. Then

$$\sin \hat{\beta} \leq \sin \tilde{\beta} + \sin \beta.$$

Also

$$\begin{aligned} \sin \tilde{\beta} &= \frac{\|\mu - \mu_{\tilde{S}(\theta)}\|}{\|\mu\|} \\ &\leq \frac{\|\mu - \mu_{\tilde{S}(\theta)}\|}{\|\mu\|} \\ &\leq \frac{4\sigma\sqrt{\alpha}\sqrt{|S(\theta)| - |\tilde{S}(\theta)|}}{\|\mu\|} \\ &\leq 8\frac{\sigma\sqrt{s\alpha}}{\lambda}. \end{aligned}$$

Using the same argument as the proof of Theorem 1, we have that as long as the above bound is smaller than  $\frac{1}{2\sqrt{5}}$ ,

$$\begin{aligned} \mathbb{E}L_\theta(\hat{F}) &\leq 600 \max\left(\frac{\sigma^2}{\left(\frac{\lambda}{2} - 4\sigma\sqrt{s\alpha}\right)^2}, 1\right) \sqrt{\frac{s \log(ns)}{n}} + 104\frac{\sigma\sqrt{s\alpha}}{\lambda} + \frac{3}{n} \\ &\leq 603 \max\left(16\frac{\sigma^2}{\lambda^2}, 1\right) \sqrt{\frac{s \log(ns)}{n}} + 104\frac{\sigma\sqrt{s\alpha}}{\lambda}. \end{aligned}$$

However, when  $8\frac{\sigma\sqrt{s\alpha}}{\lambda} > \frac{1}{2\sqrt{5}}$ , the above bound is bigger than  $\frac{1}{2}$ , which is a trivial upper bound on the clustering error, hence the bound can be stated without further conditions. Finally, since  $\alpha \leq \frac{1}{4}$ , we must have  $\frac{\log(nd)}{n} \leq 1$ , so  $\alpha \leq (\sqrt{6} + 2)\sqrt{\frac{\log(nd)}{n}}$ , which completes the proof.  $\square$

### 3 Lower bounds

#### 3.1 Standard tools

**Lemma 2.** Let  $P_0, P_1, \dots, P_M$  be probability measures satisfying

$$\frac{1}{M} \sum_{i=1}^M \text{KL}(P_i, P_0) \leq \alpha \log M$$

where  $0 < \alpha < 1/8$  and  $M \geq 2$ . Then

$$\inf_{\psi} \max_{i \in [0..M]} P_i(\psi \neq i) \geq 0.07$$

(Tsybakov (2009)).

**Lemma 3. (Varshamov–Gilbert bound)** Let  $\Omega = \{0, 1\}^m$  for  $m \geq 8$ . Then there exists a subset  $\{\omega_0, \dots, \omega_M\} \subseteq \Omega$  such that  $\omega_0 = (0, \dots, 0)$ ,

$$\rho(\omega_i, \omega_j) \geq \frac{m}{8}, \quad \forall 0 \leq i < j \leq M,$$

and

$$M \geq 2^{m/8},$$

where  $\rho$  denotes the Hamming distance between two vectors (Tsybakov (2009)).

**Lemma 4.** Let  $\Omega = \{\omega \in \{0, 1\}^m : \|\omega\|_0 = s\}$  for integers  $m > s \geq 1$ . For any  $\alpha, \beta \in (0, 1)$  such that  $s \leq \alpha\beta m$ , there exists  $\omega_0, \dots, \omega_M \in \Omega$  such that for all  $0 \leq i < j \leq M$ ,

$$\rho(\omega_i, \omega_j) > 2(1 - \alpha)s$$

and

$$\log(M + 1) \geq cs \log\left(\frac{m}{s}\right)$$

where

$$c = \frac{\alpha}{-\log(\alpha\beta)}(-\log \beta + \beta - 1).$$

In particular, setting  $\alpha = 3/4$  and  $\beta = 1/3$ , we have that  $\rho(\omega_i, \omega_j) > s/2$ ,  $\log(M + 1) \geq \frac{s}{5} \log\left(\frac{m}{s}\right)$ , as long as  $s \leq m/4$  (Massart (2007), Lemma 4.10).

### 3.2 A reduction to hypothesis testing without a general triangle inequality

**Proposition 12.** Let  $\theta_0, \dots, \theta_M \in \Theta_\lambda$  (or  $\Theta_{\lambda, s}$ ),  $M \geq 2$ ,  $0 < \alpha < 1/8$ , and  $\gamma > 0$ . If

$$\max_{i \in [M]} \text{KL}(P_{\theta_i}, P_{\theta_0}) \leq \frac{\alpha \log M}{n}$$

and for all  $0 \leq i \neq j \leq M$  and clusterings  $\hat{F}$ ,

$$L_{\theta_i}(\hat{F}) < \gamma \text{ implies } L_{\theta_j}(\hat{F}) \geq \gamma,$$

then

$$\inf_{\hat{F}_n} \max_{i \in [0..M]} \mathbb{E}_{\theta_i} L_{\theta_i}(\hat{F}_n) \geq 0.07\gamma.$$

*Proof.* Using Markov's inequality,

$$\inf_{\hat{F}_n} \max_{i \in [0..M]} \mathbb{E}_{\theta_i} L_{\theta_i}(\hat{F}_n) \geq \gamma \inf_{\hat{F}_n} \max_{i \in [0..M]} P_{\theta_i}^n \left( L_{\theta_i}(\hat{F}_n) \geq \gamma \right).$$

Define  $\psi^*(\hat{F}_n) = \underset{i \in [0..M]}{\operatorname{argmin}} L_{\theta_i}(\hat{F}_n)$ . By assumption,  $L_{\theta_i}(\hat{F}_n) < \gamma$  implies  $L_{\theta_j}(\hat{F}_n) \geq \gamma$  for any  $j \neq i$ , so  $L_{\theta_i}(\hat{F}_n) < \gamma$  only when  $\psi^*(\hat{F}_n) = i$ . Hence,

$$P_{\theta_i}^n \left( \psi^*(\hat{F}_n) = i \right) \geq P_{\theta_i}^n \left( L_{\theta_i}(\hat{F}_n) < \gamma \right)$$

and

$$\begin{aligned} \inf_{\hat{F}_n} \max_{i \in [0..M]} P_{\theta_i}^n \left( L_{\theta_i}(\hat{F}_n) \geq \gamma \right) &\geq \max_{i \in [0..M]} P_{\theta_i}^n \left( \psi^*(\hat{F}_n) \neq i \right) \\ &\geq \inf_{\hat{\psi}_n} \max_{i \in [0..M]} P_{\theta_i}^n \left( \hat{\psi}_n \neq i \right) \\ &\geq 0.07 \end{aligned}$$

where the last step is by Lemma 2. □

### 3.3 Properties of the clustering error

**Proposition 13.** For any  $\theta, \theta' \in \Theta_\lambda$ , and any clustering  $\hat{F}$ , if

$$L_\theta(F_{\theta'}) + L_\theta(\hat{F}) + \sqrt{\frac{\text{KL}(P_\theta, P_{\theta'})}{2}} \leq \frac{1}{2},$$

then

$$L_\theta(F_{\theta'}) - L_\theta(\hat{F}) - \sqrt{\frac{\text{KL}(P_\theta, P_{\theta'})}{2}} \leq L_{\theta'}(\hat{F}) \leq L_\theta(F_{\theta'}) + L_\theta(\hat{F}) + \sqrt{\frac{\text{KL}(P_\theta, P_{\theta'})}{2}}.$$

*Proof.* WLOG assume  $F_\theta, F_{\theta'}$ , and  $\hat{F}$  are such that, using simplified notation,

$$L_\theta(F_{\theta'}) = P_\theta(F_\theta \neq F_{\theta'})$$

and

$$L_\theta(\hat{F}) = P_\theta(F_\theta \neq \hat{F}).$$

Then

$$\begin{aligned} P_\theta(F_{\theta'} \neq \hat{F}) &= P_\theta\left((F_\theta = F_{\theta'}) \cap (F_\theta \neq \hat{F}) \cup (F_\theta \neq F_{\theta'}) \cap (F_\theta = \hat{F})\right) \\ &= P_\theta\left((F_\theta = F_{\theta'}) \cap (F_\theta \neq \hat{F})\right) + P_\theta\left((F_\theta \neq F_{\theta'}) \cap (F_\theta = \hat{F})\right). \end{aligned}$$

Since

$$0 \leq P_\theta\left((F_\theta = F_{\theta'}) \cap (F_\theta \neq \hat{F})\right) \leq P_\theta(F_\theta \neq \hat{F}) = L_\theta(\hat{F}),$$

$$P_\theta\left((F_\theta \neq F_{\theta'}) \cap (F_\theta = \hat{F})\right) \leq P_\theta(F_\theta \neq F_{\theta'}) = L_\theta(F_{\theta'}),$$

and

$$L_\theta(F_{\theta'}) - L_\theta(\hat{F}) = P_\theta(F_\theta \neq F_{\theta'}) - P_\theta(F_\theta \neq \hat{F}) \leq P_\theta\left((F_\theta \neq F_{\theta'}) \cap (F_\theta = \hat{F})\right),$$

we have that

$$L_\theta(F_{\theta'}) - L_\theta(\hat{F}) \leq P_\theta(F_{\theta'} \neq \hat{F}) \leq L_\theta(F_{\theta'}) + L_\theta(\hat{F})$$

and

$$L_\theta(F_{\theta'}) - L_\theta(\hat{F}) - \text{TV}(P_\theta, P_{\theta'}) \leq P_{\theta'}(F_{\theta'} \neq \hat{F}) \leq L_\theta(F_{\theta'}) + L_\theta(\hat{F}) + \text{TV}(P_\theta, P_{\theta'}).$$

It is easy to see that if  $L_\theta(F_{\theta'}) + L_\theta(\hat{F}) + \text{TV}(P_\theta, P_{\theta'}) \leq \frac{1}{2}$ , then the above bound implies

$$L_\theta(F_{\theta'}) - L_\theta(\hat{F}) - \text{TV}(P_\theta, P_{\theta'}) \leq L_{\theta'}(\hat{F}) \leq L_\theta(F_{\theta'}) + L_\theta(\hat{F}) + \text{TV}(P_\theta, P_{\theta'}).$$

The final step is to use the fact that  $\text{TV}(P_\theta, P_{\theta'}) \leq \sqrt{\frac{\text{KL}(P_\theta, P_{\theta'})}{2}}$ . □

**Proposition 14.** For some  $\mu_0, \mu, \mu' \in \mathbb{R}^d$  such that  $\|\mu\| = \|\mu'\|$ , let

$$\theta = \left(\mu_0 - \frac{\mu}{2}, \mu_0 + \frac{\mu}{2}\right)$$

and

$$\theta' = \left(\mu_0 - \frac{\mu'}{2}, \mu_0 + \frac{\mu'}{2}\right).$$

Then

$$2g\left(\frac{\|\mu\|}{2\sigma}\right) \sin \beta \cos \beta \leq L_\theta(F_{\theta'}) \leq \frac{1}{\pi} \tan \beta$$

where  $\cos \beta = \frac{|\mu^T \mu'|}{\|\mu\|^2}$  and  $g(x) = \phi(x)(\phi(x) - x\Phi(-x))$ .

*Proof.* It is easy to see that

$$L_\theta(F_{\theta'}) = \frac{1}{2} \int_{\mathbb{R}} \frac{1}{\sigma} \phi\left(\frac{x}{\sigma}\right) \left( \Phi\left(\frac{\|\mu\|}{2\sigma} + \frac{|x| \tan \beta}{\sigma}\right) - \Phi\left(\frac{\|\mu\|}{2\sigma} - \frac{|x| \tan \beta}{\sigma}\right) \right) dx.$$

Define  $\xi = \frac{\|\mu\|}{2\sigma}$ . With a change of variables, we have

$$\begin{aligned} L_\theta(F_{\theta'}) &= \frac{1}{2} \int_{\mathbb{R}} \phi(x) (\Phi(\xi + |x| \tan \beta) - \Phi(\xi - |x| \tan \beta)) dx \\ &= \int_0^\infty \phi(x) (\Phi(\xi + x \tan \beta) - \Phi(\xi - x \tan \beta)) dx. \end{aligned}$$

For any  $a \leq b$ ,  $\Phi(b) - \Phi(a) \leq \frac{b-a}{\sqrt{2\pi}}$ , so

$$\begin{aligned} L_\theta(F_{\theta'}) &= \int_0^\infty \phi(x) (\Phi(\xi + x \tan \beta) - \Phi(\xi - x \tan \beta)) dx \\ &\leq \int_0^\infty \phi(x) (\Phi(x \tan \beta) - \Phi(-x \tan \beta)) dx \\ &\leq \tan \beta \sqrt{\frac{2}{\pi}} \int_0^\infty x \phi(x) dx \\ &= \frac{1}{\pi} \tan \beta. \end{aligned}$$

Also,

$$\begin{aligned} L_\theta(F_{\theta'}) &= \int_0^\infty \phi(x) (\Phi(\xi + x \tan \beta) - \Phi(\xi - x \tan \beta)) dx \\ &\geq 2 \tan \beta \int_0^\infty x \phi(x) \phi(\xi + x \tan \beta) dx \\ &= 2 \tan \beta \frac{1}{\sqrt{2\pi}} \int_0^\infty x \frac{1}{\sqrt{2\pi}} \exp\left\{-\frac{x^2 + (\xi + x \tan \beta)^2}{2}\right\} dx \\ &= 2 \tan \beta \frac{1}{\sqrt{2\pi}} \exp\left\{-\frac{\xi^2}{2} \left(1 - \frac{\tan^2 \beta}{1 + \tan^2 \beta}\right)\right\} \int_0^\infty x \frac{1}{\sqrt{2\pi}} \exp\left\{-\frac{\left(x + \frac{\xi \tan \beta}{1 + \tan^2 \beta}\right)^2}{2 \left(\frac{1}{\sqrt{1 + \tan^2 \beta}}\right)^2}\right\} dx \\ &\geq 2 \tan \beta \frac{1}{\sqrt{2\pi}} \exp\left\{-\frac{\xi^2}{2}\right\} \int_0^\infty x \frac{1}{\sqrt{2\pi}} \exp\left\{-\frac{(x + \xi \sin \beta \cos \beta)^2}{2 \cos^2 \beta}\right\} dx \\ &= 2 \tan \beta \phi(\xi) \left[ \frac{\cos^2 \beta}{\sqrt{2\pi}} \exp\left\{-\frac{\xi^2 \sin^2 \beta}{2}\right\} - \xi \sin \beta \cos^2 \beta \Phi(-\xi \sin \beta) \right] \\ &= 2 \sin \beta \cos \beta \phi(\xi) [\phi(\xi \sin \beta) - \xi \sin \beta \Phi(-\xi \sin \beta)] \\ &\geq 2 \sin \beta \cos \beta \phi(\xi) [\phi(\xi) - \xi \Phi(-\xi)]. \end{aligned}$$

□



### 3.4 A KL divergence bound of the necessary order

**Proposition 15.** For some  $\mu_0, \mu, \mu' \in \mathbb{R}^d$  such that  $\|\mu\| = \|\mu'\|$ , let

$$\theta = \left( \mu_0 - \frac{\mu}{2}, \mu_0 + \frac{\mu}{2} \right)$$

and

$$\theta' = \left( \mu_0 - \frac{\mu'}{2}, \mu_0 + \frac{\mu'}{2} \right).$$

Then

$$\text{KL}(P_\theta, P_{\theta'}) \leq \xi^4 (1 - \cos \beta)$$

where  $\xi = \frac{\|\mu\|}{2\sigma}$  and  $\cos \beta = \frac{|\mu^T \mu'|}{\|\mu\| \|\mu'\|}$ .

*Proof.* Since the KL divergence is invariant to affine transformations, it is easy to see that

$$\text{KL}(P_\theta, P_{\theta'}) = \int_{\mathbb{R}} \int_{\mathbb{R}} p_1(x, y) \log \frac{p_1(x, y)}{p_2(x, y)} dx dy$$

where

$$p_1(x, y) = \frac{1}{2} \phi(x + \xi_x) \phi(y + \xi_y) + \frac{1}{2} \phi(x - \xi_x) \phi(y - \xi_y),$$

$$p_2(x, y) = \frac{1}{2} \phi(x + \xi_x) \phi(y - \xi_y) + \frac{1}{2} \phi(x - \xi_x) \phi(y + \xi_y),$$

$$\xi_x = \xi \cos \frac{\beta}{2}, \quad \xi_y = \xi \sin \frac{\beta}{2}.$$

Since

$$\begin{aligned} \frac{p_1(x, y)}{p_2(x, y)} &= \frac{\phi(x + \xi_x) \phi(y + \xi_y) + \phi(x - \xi_x) \phi(y - \xi_y)}{\phi(x + \xi_x) \phi(y - \xi_y) + \phi(x - \xi_x) \phi(y + \xi_y)} \\ &= \frac{\exp(-x\xi_x - y\xi_y) + \exp(x\xi_x + y\xi_y)}{\exp(-x\xi_x + y\xi_y) + \exp(x\xi_x - y\xi_y)} \end{aligned}$$

we have

$$\log \frac{p_1(x, y)}{p_2(x, y)} = \log \frac{\cosh(x\xi_x + y\xi_y)}{\cosh(x\xi_x - y\xi_y)}.$$

Furthermore,

$$\begin{aligned} & \int_{\mathbb{R}} \int_{\mathbb{R}} \frac{1}{2} \phi(x + \xi_x) \phi(y + \xi_y) \log \frac{\cosh(x\xi_x + y\xi_y)}{\cosh(x\xi_x - y\xi_y)} dx dy \\ &= \int_{\mathbb{R}} \int_{\mathbb{R}} \frac{1}{2} \phi(-x + \xi_x) \phi(-y + \xi_y) \log \frac{\cosh(-x\xi_x - y\xi_y)}{\cosh(-x\xi_x + y\xi_y)} dx dy \\ &= \int_{\mathbb{R}} \int_{\mathbb{R}} \frac{1}{2} \phi(x - \xi_x) \phi(y - \xi_y) \log \frac{\cosh(x\xi_x + y\xi_y)}{\cosh(x\xi_x - y\xi_y)} dx dy \end{aligned}$$

so

$$\begin{aligned} \text{KL}(P_\theta, P_{\theta'}) &= \int_{\mathbb{R}} \int_{\mathbb{R}} \phi(x - \xi_x) \phi(y - \xi_y) \log \frac{\cosh(x\xi_x + y\xi_y)}{\cosh(x\xi_x - y\xi_y)} dx dy \\ &= \int_{\mathbb{R}} \int_{\mathbb{R}} \phi(x) \phi(y) \log \frac{\cosh(x\xi_x + \xi_x^2 + y\xi_y + \xi_y^2)}{\cosh(x\xi_x + \xi_x^2 - y\xi_y - \xi_y^2)} dx dy. \end{aligned}$$

But for any  $x$

$$\begin{aligned}
& - \int_{\mathbb{R}} \phi(x) \phi(y) \log \cosh(x\xi_x + \xi_x^2 - y\xi_y - \xi_y^2) dy \\
& = - \int_{\mathbb{R}} \phi(x) \phi(-y) \log \cosh(x\xi_x + \xi_x^2 + y\xi_y - \xi_y^2) dy \\
& = - \int_{\mathbb{R}} \phi(x) \phi(y) \log \cosh(x\xi_x + \xi_x^2 + y\xi_y - \xi_y^2) dy,
\end{aligned}$$

thus,

$$\begin{aligned}
\text{KL}(P_\theta, P_{\theta'}) &= \int_{\mathbb{R}} \int_{\mathbb{R}} \phi(x) \phi(y) \log \frac{\cosh(x\xi_x + \xi_x^2 + y\xi_y + \xi_y^2)}{\cosh(x\xi_x + \xi_x^2 + y\xi_y - \xi_y^2)} dx dy \\
&= \int_{\mathbb{R}} \phi(z) \log \frac{\cosh(z\sqrt{\xi_x^2 + \xi_y^2} + \xi_x^2 + \xi_y^2)}{\cosh(z\sqrt{\xi_x^2 + \xi_y^2} + \xi_x^2 - \xi_y^2)} dz \\
&= \int_{\mathbb{R}} \phi(z) \log \frac{\cosh(\xi z + \xi_x^2 + \xi_y^2)}{\cosh(\xi z + \xi_x^2 - \xi_y^2)} dz
\end{aligned}$$

since  $\xi_x^2 + \xi_y^2 = \xi^2$ . By the mean value theorem and the fact that  $\tanh$  is monotonically increasing,

$$\begin{aligned}
\log \frac{\cosh(\xi z + \xi_x^2 + \xi_y^2)}{\cosh(\xi z + \xi_x^2 - \xi_y^2)} &\leq 2\xi_y^2 \tanh(\xi z + \xi_x^2 + \xi_y^2) \\
&= 2\xi_y^2 \tanh(\xi z + \xi^2)
\end{aligned}$$

for all  $z$ . Since  $\tanh$  is an odd function,

$$\begin{aligned}
\text{KL}(P_\theta, P_{\theta'}) &\leq 2\xi_y^2 \int_{\mathbb{R}} \phi(z) \tanh(\xi z + \xi^2) dz \\
&= 2\xi_y^2 \int_{\mathbb{R}} \phi(z) (\tanh(\xi z + \xi^2) - \tanh(\xi z)) dz.
\end{aligned}$$

Using the mean value theorem again,

$$\begin{aligned}
\tanh(\xi z + \xi^2) - \tanh(\xi z) &\leq \xi^2 \max_{x \in [\xi z, \xi z + \xi^2]} (1 - \tanh^2(x)) \\
&\leq \xi^2
\end{aligned}$$

for all  $z$ , so

$$\begin{aligned}
\text{KL}(P_\theta, P_{\theta'}) &\leq 2\xi^2 \xi_y^2 \\
&= 2\xi^4 \sin^2 \frac{\beta}{2} \\
&= \xi^4 (1 - \cos \beta).
\end{aligned}$$

□

### 3.5 Non-sparse lower bound

**Theorem 3.** Assume that  $d \geq 9$  and  $\frac{\lambda}{\sigma} \leq 0.2$ . Then

$$\inf_{\hat{F}_n} \sup_{\theta \in \Theta_\lambda} \mathbb{E}_\theta L_\theta(\hat{F}_n) \geq \frac{1}{500} \min \left\{ \frac{\sqrt{\log 2} \sigma^2}{3 \lambda^2} \sqrt{\frac{d-1}{n}}, \frac{1}{4} \right\}.$$

*Proof.* Let  $\xi = \frac{\lambda}{2\sigma}$ , and define

$$\epsilon = \min \left\{ \frac{\sqrt{\log 2}}{3} \frac{\sigma^2}{\lambda} \frac{1}{\sqrt{n}}, \frac{\lambda}{4\sqrt{d-1}} \right\}.$$

Define  $\lambda_0^2 = \lambda^2 - (d-1)\epsilon^2$ . Let  $\Omega = \{0, 1\}^{d-1}$ . For  $\omega = (\omega(1), \dots, \omega(d-1)) \in \Omega$ , let  $\mu_\omega = \lambda_0 e_d + \sum_{i=1}^{d-1} (2\omega(i) - 1)\epsilon e_i$  (where  $\{e_i\}_{i=1}^d$  is the standard basis for  $\mathbb{R}^d$ ). Let  $\theta_\omega = \left(-\frac{\mu_\omega}{2}, \frac{\mu_\omega}{2}\right) \in \Theta_\lambda$ .

By Proposition 15, for any  $\omega, \nu \in \Omega$ ,

$$\text{KL}(P_{\theta_\omega}, P_{\theta_\nu}) \leq \xi^4 (1 - \cos \beta_{\omega, \nu})$$

where

$$\cos \beta_{\omega, \nu} = \frac{|\mu_\omega^T \mu_\nu|}{\lambda^2} = 1 - \frac{2\rho(\omega, \nu)\epsilon^2}{\lambda^2}$$

and  $\rho$  is the Hamming distance, so

$$\begin{aligned} \text{KL}(P_{\theta_\omega}, P_{\theta_\nu}) &\leq \xi^4 \frac{2\rho(\omega, \nu)\epsilon^2}{\lambda^2} \\ &\leq \xi^4 \frac{2(d-1)\epsilon^2}{\lambda^2}. \end{aligned}$$

By Proposition 14, since  $\cos \beta_{\omega, \nu} \geq \frac{1}{2}$ ,

$$\begin{aligned} L_{\theta_\omega}(F_{\theta_\nu}) &\leq \frac{1}{\pi} \tan \beta_{\omega, \nu} \\ &\leq \frac{1}{\pi} \frac{\sqrt{1 + \cos \beta_{\omega, \nu}}}{\cos \beta_{\omega, \nu}} \sqrt{1 - \cos \beta_{\omega, \nu}} \\ &\leq \frac{4}{\pi} \frac{\sqrt{d-1}\epsilon}{\lambda} \end{aligned}$$

and

$$\begin{aligned} L_{\theta_\omega}(F_{\theta_\nu}) &\geq 2g(\xi) \sin \beta_{\omega, \nu} \cos \beta_{\omega, \nu} \\ &\geq g(\xi) \sin \beta_{\omega, \nu} \\ &\geq \sqrt{2}g(\xi) \frac{\sqrt{\rho(\omega, \nu)}\epsilon}{\lambda} \end{aligned}$$

where  $g(x) = \phi(x)(\phi(x) - x\Phi(-x))$ . By Lemma 3, there exist  $\omega_0, \dots, \omega_M \in \Omega$  such that  $M \geq 2^{(d-1)/8}$  and

$$\rho(\omega_i, \omega_j) \geq \frac{d-1}{8}, \quad \forall 0 \leq i < j \leq M.$$

For simplicity of notation, let  $\theta_i = \theta_{\omega_i}$  for all  $i \in [0..M]$ . Then, for  $i \neq j \in [0..M]$ ,

$$\text{KL}(P_{\theta_i}, P_{\theta_j}) \leq \xi^4 \frac{2(d-1)\epsilon^2}{\lambda^2},$$

and

$$L_{\theta_i}(F_{\theta_j}) \leq \frac{4}{\pi} \frac{\sqrt{d-1}\epsilon}{\lambda}$$

and

$$L_{\theta_i}(F_{\theta_j}) \geq \frac{1}{2}g(\xi) \frac{\sqrt{d-1}\epsilon}{\lambda}.$$

Define

$$\gamma = \frac{1}{4}(g(\xi) - 2\xi^2) \frac{\sqrt{d-1}\epsilon}{\lambda}.$$

Then for any  $i \neq j \in [0..M]$ , and any  $\hat{F}$  such that  $L_{\theta_i}(\hat{F}) < \gamma$ ,

$$L_{\theta_i}(F_{\theta_j}) + L_{\theta_i}(\hat{F}) + \sqrt{\frac{\text{KL}(P_{\theta_i}, P_{\theta_j})}{2}} < \left( \frac{4}{\pi} + \frac{1}{4}(g(\xi) - 2\xi^2) + \xi^2 \right) \frac{\sqrt{d-1}\epsilon}{\lambda} \leq \frac{1}{2}$$

because, for  $\xi \leq 0.1$ , by definition of  $\epsilon$ ,

$$\left( \frac{4}{\pi} + \frac{1}{4}(g(\xi) - 2\xi^2) + \xi^2 \right) \frac{\sqrt{d-1}\epsilon}{\lambda} \leq 2 \frac{\sqrt{d-1}\epsilon}{\lambda} \leq \frac{1}{2}.$$

So, by Proposition 13,

$$L_{\theta_j}(\hat{F}) \geq L_{\theta_i}(F_{\theta_j}) - L_{\theta_i}(\hat{F}) - \sqrt{\frac{\text{KL}(P_{\theta_i}, P_{\theta_j})}{2}} \geq \gamma.$$

Also,

$$\begin{aligned} \max_{i \in [M]} \text{KL}(P_{\theta_i}, P_{\theta_0}) &\leq (d-1)\xi^4 \frac{2\epsilon^2}{\lambda^2} \\ &\leq \frac{\log M}{9n} \end{aligned}$$

because, by definition of  $\epsilon$ ,

$$\xi^4 \frac{2\epsilon^2}{\lambda^2} \leq \frac{\log 2}{72n}.$$

So by Proposition 12 and the fact that  $\xi \leq 0.1$ ,

$$\begin{aligned} \inf_{\hat{F}_n} \max_{i \in [0..M]} \mathbb{E}_{\theta_i} L_{\theta_i}(\hat{F}_n) &\geq 0.07\gamma \\ &= 0.07 \frac{1}{4}(g(\xi) - 2\xi^2) \frac{\sqrt{d-1}\epsilon}{\lambda} \\ &\geq \frac{1}{500} \min \left\{ \frac{\sqrt{\log 2}}{3} \frac{\sigma^2}{\lambda^2} \sqrt{\frac{d-1}{n}}, \frac{1}{4} \right\} \end{aligned}$$

and to complete the proof we use the fact that

$$\inf_{\hat{F}_n} \sup_{\theta \in \Theta_\lambda} \mathbb{E}_\theta L_\theta(\hat{F}_n) \geq \inf_{\hat{F}_n} \max_{i \in [0..M]} \mathbb{E}_{\theta_i} L_{\theta_i}(\hat{F}_n).$$

□

### 3.6 Sparse lower bound

**Theorem 4.** Assume that  $\frac{\lambda}{\sigma} \leq 0.2$ ,  $d \geq 17$ , and

$$5 \leq s \leq \frac{d-1}{4} + 1.$$

Then

$$\inf_{\hat{F}_n} \sup_{\theta \in \Theta_{\lambda,s}} \mathbb{E}_\theta L_\theta(\hat{F}_n) \geq \frac{1}{600} \min \left\{ \sqrt{\frac{8}{45}} \frac{\sigma^2}{\lambda^2} \sqrt{\frac{s-1}{n} \log \left( \frac{d-1}{s-1} \right)}, \frac{1}{2} \right\}.$$

*Proof.* For simplicity, we state this proof for  $\Theta_{\lambda,s+1}$ , assuming  $4 \leq s \leq \frac{d-1}{4}$ . Let  $\xi = \frac{\lambda}{2\sigma}$ , and define

$$\epsilon = \min \left\{ \sqrt{\frac{8}{45}} \frac{\sigma^2}{\lambda} \sqrt{\frac{1}{n} \log \left( \frac{d-1}{s} \right)}, \frac{1}{2} \frac{\lambda}{\sqrt{s}} \right\}.$$

Define  $\lambda_0^2 = \lambda^2 - s\epsilon^2$ . Let  $\Omega = \{\omega \in \{0, 1\}^{d-1} : \|\omega\|_0 = s\}$ . For  $\omega = (\omega(1), \dots, \omega(d-1)) \in \Omega$ , let  $\mu_\omega = \lambda_0 e_d + \sum_{i=1}^{d-1} \omega(i) \epsilon e_i$  (where  $\{e_i\}_{i=1}^d$  is the standard basis for  $\mathbb{R}^d$ ). Let  $\theta_\omega = \left( -\frac{\mu_\omega}{2}, \frac{\mu_\omega}{2} \right) \in \Theta_{\lambda,s}$ .

By Proposition 15,

$$\text{KL}(P_{\theta_\omega}, P_{\theta_\nu}) \leq \xi^4(1 - \cos \beta_{\omega,\nu})$$

where

$$\cos \beta_{\omega,\nu} = \frac{|\mu_\omega^T \mu_\nu|}{\lambda^2} = 1 - \frac{\rho(\omega, \nu)\epsilon^2}{2\lambda^2}$$

and  $\rho$  is the Hamming distance, so

$$\begin{aligned} \text{KL}(P_{\theta_\omega}, P_{\theta_\nu}) &\leq \xi^4 \frac{\rho(\omega, \nu)\epsilon^2}{2\lambda^2} \\ &\leq \xi^4 \frac{s\epsilon^2}{\lambda^2}. \end{aligned}$$

By Proposition 14, since  $\cos \beta_{\omega,\nu} \geq \frac{1}{2}$ ,

$$\begin{aligned} L_{\theta_\omega}(F_{\theta_\nu}) &\leq \frac{1}{\pi} \tan \beta_{\omega,\nu} \\ &\leq \frac{2}{\pi} \sin \beta_{\omega,\nu} \\ &\leq \frac{2\sqrt{2}}{\pi} \frac{\sqrt{s\epsilon}}{\lambda} \end{aligned}$$

and

$$\begin{aligned} L_{\theta_\omega}(F_{\theta_\nu}) &\geq 2g(\xi) \sin \beta_{\omega,\nu} \cos \beta_{\omega,\nu} \\ &\geq g(\xi) \sin \beta_{\omega,\nu} \\ &\geq \frac{g(\xi)}{\sqrt{2}} \frac{\sqrt{\rho(\omega, \nu)\epsilon}}{\lambda} \end{aligned}$$

where  $g(x) = \phi(x)(\phi(x) - x\Phi(-x))$ . By Lemma 4, there exist  $\omega_0, \dots, \omega_M \in \Omega$  such that  $\log(M+1) \geq \frac{s}{5} \log\left(\frac{d-1}{s}\right)$  and

$$\rho(\omega_i, \omega_j) \geq \frac{s}{2}, \quad \forall 0 \leq i < j \leq M.$$

For simplicity of notation, let  $\theta_i = \theta_{\omega_i}$  for all  $i \in [0..M]$ . Then, for  $i \neq j \in [0..M]$ ,

$$\text{KL}(P_{\theta_i}, P_{\theta_j}) \leq \xi^4 \frac{s\epsilon^2}{\lambda^2},$$

and

$$L_{\theta_i}(F_{\theta_j}) \leq \frac{2\sqrt{2}}{\pi} \frac{\sqrt{s\epsilon}}{\lambda}$$

and

$$L_{\theta_i}(F_{\theta_j}) \geq \frac{g(\xi)}{2} \frac{\sqrt{s\epsilon}}{\lambda}.$$

Define

$$\gamma = \frac{1}{4}(g(\xi) - \sqrt{2}\xi^2) \frac{\sqrt{s\epsilon}}{\lambda}.$$

Then for any  $i \neq j \in [0..M]$ , and any  $\hat{F}$  such that  $L_{\theta_i}(\hat{F}) < \gamma$ ,

$$L_{\theta_i}(F_{\theta_j}) + L_{\theta_i}(\hat{F}) + \sqrt{\frac{\text{KL}(P_{\theta_i}, P_{\theta_j})}{2}} < \left( \frac{2\sqrt{2}}{\pi} + \frac{1}{4}(g(\xi) - \sqrt{2}\xi^2) + \frac{\xi^2}{\sqrt{2}} \right) \frac{\sqrt{s\epsilon}}{\lambda} \leq \frac{1}{2}$$

because, for  $\xi \leq 0.1$ , by definition of  $\epsilon$ ,

$$\left( \frac{2\sqrt{2}}{\pi} + \frac{1}{4}(g(\xi) - \sqrt{2}\xi^2) + \frac{\xi^2}{\sqrt{2}} \right) \frac{\sqrt{s\epsilon}}{\lambda} \leq \frac{\sqrt{s\epsilon}}{\lambda} \leq \frac{1}{2}.$$

So, by Proposition 13,

$$L_{\theta_j}(\hat{F}) \geq L_{\theta_i}(F_{\theta_j}) - L_{\theta_i}(\hat{F}) - \sqrt{\frac{\text{KL}(P_{\theta_i}, P_{\theta_j})}{2}} \geq \gamma.$$

Also,

$$\begin{aligned} \max_{i \in [M]} \text{KL}(P_{\theta_i}, P_{\theta_0}) &\leq \xi^4 \frac{s\epsilon^2}{\lambda^2} \\ &\leq \frac{1}{18n} \log \left( \left( \frac{d-1}{s} \right)^{\frac{s}{5}} \right) \\ &\leq \frac{1}{9n} \log \left( \left( \left( \frac{d-1}{s} \right)^{\frac{s}{5}} - 1 \right) \right) \\ &\leq \frac{\log M}{9n} \end{aligned}$$

because, by definition of  $\epsilon$ ,

$$\xi^4 \frac{s\epsilon^2}{\lambda^2} \leq \frac{s}{90n} \log \left( \frac{d-1}{s} \right).$$

So by Proposition 12 and the fact that  $\xi \leq 0.1$ ,

$$\begin{aligned} \inf_{\hat{F}_n} \max_{i \in [0..M]} \mathbb{E}_{\theta_i} L_{\theta_i}(\hat{F}_n) &\geq 0.07\gamma \\ &\geq 0.07 \frac{0.1}{4} \frac{\sqrt{s}\epsilon}{\lambda} \\ &\geq \frac{1}{600} \min \left\{ \sqrt{\frac{8}{45}} \frac{\sigma^2}{\lambda^2} \sqrt{\frac{s}{n} \log \left( \frac{d-1}{s} \right)}, \frac{1}{2} \right\} \end{aligned}$$

and to complete the proof we use the fact that

$$\inf_{\hat{F}_n} \sup_{\theta \in \Theta_{\lambda, s}} \mathbb{E}_{\theta} L_{\theta}(\hat{F}_n) \geq \inf_{\hat{F}_n} \max_{i \in [0..M]} \mathbb{E}_{\theta_i} L_{\theta_i}(\hat{F}_n).$$

□

## References

- G.H. Golub and C.F. Van Loan. *Matrix Computations*. Johns Hopkins Studies in the Mathematical Sciences. Johns Hopkins University Press, 3rd edition, 1996. ISBN 9780801854149.
- Pascal Massart. Concentration inequalities and model selection. 2007.
- Alexandre B. Tsybakov. *Introduction to Nonparametric Estimation*. Springer Series in Statistics. Springer, 2009.
